# Supplementary material
Source: PubMed Central journal article supplement (PMC2919899)
Supplement: 1001725107_pnas.201001725SI.pdf [file 1001725107_pnas.201001725SI.pdf]

# Supporting Information

Liu et al. 10.1073/pnas.1001725107

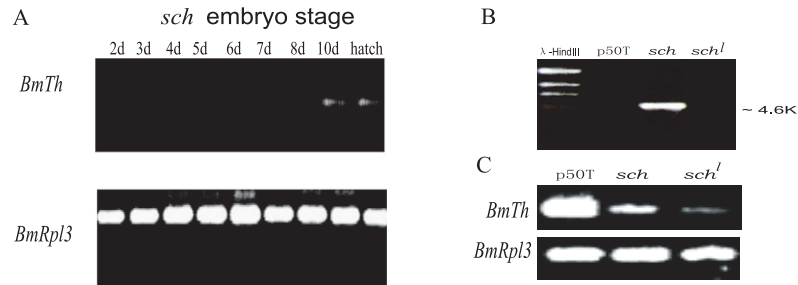

**Fig. S1.** (A) Expression profile of *BmTh* in *sch* embryos with semiquantitative RT-PCR; *BmRpl3* was used for normalization. (B) PCR amplification of the ~4.6-kb mariner-like transposon which replaced the ~70-kb sequence upstream of the *BmTh* gene in *sch* with the primer sets *sch\_d\_10k-1F* and *sch\_d\_70k-0R* (Table S4). PCR condition was 94 °C for 5 min, followed by 40 cycles of 94 °C for 30 s, 60 °C for 30 s, and 72 °C for 5 min, with a final extension at 72 °C for 10 min. (C) Expression level of *BmTh* in *p50T*, *sch*, and *sch<sup>1</sup>* using semiquantitative RT-PCR.

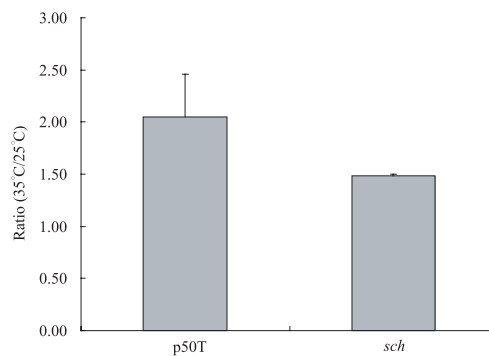

**Fig. S2.** Ratios of the relative expression level of *BmTh* under the condition of 35 and 25 °C in *p50T* and *sch* mutant, respectively. The cDNAs were from the *p50T* and *sch* embryo, which were incubated at 35 and 25 °C for 50 h from the sixth day after ending diapause, respectively. The real-time PCR condition was 95 °C for 10 s, followed by 40 cycles of 95 °C for 5 s, and 60 °C for 30 s. The relative expression level of *BmTh* was compared with *BmRpl3* in *p50T* and *sch* mutant. The ratios were compared with the relative expression quantity of *BmTh* at 35 and 25 °C ( $n = 3$ ).



**Table S4. Primers used to detect the deletion region in *sch* mutant**

| Primer name           | Forward sequence (5'-3')    | Reverse sequence (5'-3')     |
|-----------------------|-----------------------------|------------------------------|
| <i>sch</i> _2_R11_F1  | TGTCCATTCGAAAAGAATGC        | TACTTAACACCCGGTTGAGCC        |
| <i>sch</i> _2_R11_F25 | ACAGAATATGGTCGAAATAAAGG     | GTTTTATTGAAAAATATGTCTTATTGG  |
| <i>sch</i> _2_R12_F20 | TATCTCAATCTGTTGGTGCG        | CCTGAAGTCGATCACTAGTCC        |
| <i>sch</i> _2_R13_F1  | ATGCACCATGTATATGCACC        | TGTTAATATAATAAAAATCCCATTTCCG |
| <i>sch</i> _2_R13_F11 | CGTATCTGTCCAGTTTTGAAGG      | TGCACATAACACTTTCTGGC         |
| <i>sch</i> _2_R14_F1  | AAAGCTACATGTTGGACTCG        | CGCATTAAAGCACATAGAAGC        |
| <i>sch</i> _2_R14_F20 | TTAATTTTGACAAACCTGCG        | GTGTTTGCTTCAAAAATACGC        |
| <i>sch</i> _2_R15_F1  | TTCAAAATTATTATGGGGGC        | GATCGTAATGGTTCGGTAGG         |
| <i>sch</i> _2_R15_F22 | TCCAAATCTGTTCTTTCTGC        | ATGAGACTACAAAATTAATGATGG     |
| <i>sch</i> _2_R16_F1  | TTTCGGCTATGAATATCTGC        | AGACCTTAGCCTGAATGTGC         |
| <i>sch</i> _2_R16_F26 | ATTTTTAACAAAAAGAGTTACCTCAGC | CCGTAAATACAATTTTCGTCC        |
| <i>sch</i> _2_R17_F1  | AAAAAGGTCGTCTCTCCG          | TAACAAGCTTTCGAGGAACC         |
| <i>sch</i> _2_R17_F15 | CAGTTATGACGGCATCTAGG        | TATGTTCTGGAAAATTCGTGG        |
| <i>sch</i> _2_R18_F1  | ATCTTATAACGACTTATCAATCTTAGG | GCTGTTGCATAAGCTCGG           |
| <i>sch</i> _2_R18_F22 | AGTTATCCCATGACGTAGCC        | ACAAATGCCTGATCTTTGC          |
| <i>sch</i> _R8_F1     | AATCGATTATTAAGATCGCGTGG     | TGTTTTACATTTGTGTCCGG         |
| <i>sch</i> _R8_F17    | CCATCAGCGGTAGTTATACG        | CAGTGAATCCTAAGTCGCC          |
| <i>sch</i> _R9_F1     | GATGAAGTCATTGTTGTTCC        | AAAAAGCTCGAATCTTGTGG         |
| <i>sch</i> _R10_F1    | TGCGCAGGATATACTAAACG        | TGTACGAAAAGTAAATAAAAGACGC    |
| <i>sch</i> _R11_F1    | AGACTTTCATTTTTCGGTGG        | ATAATTTGTTGTTGGCACCC         |
| <i>sch</i> _R11_F18   | AAAAGATAAATCACTATAACTGCG    | GGCGTGAGGTTGTTTACC           |
| <i>sch</i> _R12_F1    | AAAACAATGCCAGGGAGG          | TATTCGAAAATTAGCTGTGCC        |
| <i>sch</i> _R13_F1    | GACCATACTTAATCATTTTTCGC     | TGTTGTTGATTGTTCTCC           |
| <i>sch</i> _R13_F25   | TTGTTGGACCAGAATACCG         | GCGTCCATAGAATAATAGCG         |
| <i>sch</i> _R14_F1    | TAAATCGCAACATAAATGCC        | ATTACGACAGAAAACACTGCG        |
| <i>sch</i> _d_10k-1   | TTCTACTATGTGGAAAATCAAAAG    | TCCGGTTGGGGATCTAGAATTT       |
| <i>sch</i> _d_10k-2   | TCTGGTAATCTTTCTACGTATGTTT   | TTTCATCAATCTGTATCTTTGTGT     |
| <i>sch</i> _d_20k-0   | TTCATTAGAGTCCGCAACAGC       | TTGAAAGGGCGGTGGATT           |
| <i>sch</i> _d_20k-1   | ACGCCAGAAAAGTGTATGTGC       | TGGTAAAAGAAGCGGTAGAGC        |
| <i>sch</i> _d_20k-2   | GTGTTCTTGCTGGGGTTAGTG       | GGATGCTGAAGGAAGGTAAGA        |
| <i>sch</i> _d_30k-0   | TAGTTTGAGCCATTGGGTGTTT      | TTCGGCGTGACTGAAACCT          |
| <i>sch</i> _d_30k-1   | TCCACATCCTACCACAACATT       | TCAGCGCAACAAAGTTAAATC        |
| <i>sch</i> _d_30k-2   | TCTCATATGTCGCTAAGCCAG       | AGTCATCCGTGACACTTATTT        |
| <i>sch</i> _d_30k-3   | TACCATATACGGAACAACAGGC      | GACCTTCTATTAGATGAGAGCA       |
| <i>sch</i> _d_40k-1   | CGAGTGAAGCAACTACTGGATAA     | CATCAGGTAACCGCACATTGT        |
| <i>sch</i> _d_40k-2   | GCCTGAAATATGAACTCGGAC       | GCATTAACGCATCGAAAACCT        |
| <i>sch</i> _d_40k-3   | TTACCAACCCCTGCTCATACA       | AAAGTTTGTCAATGTTAATCCG       |
| <i>sch</i> _d_50k-0   | TGACTCGGTGAGGGCAAAC         | GAGCATCAGGTAACCGCACA         |
| <i>sch</i> _d_50k-1   | AATTTAGACGTATTTTACCGCC      | TATCACAATAATCGATTTACGTCC     |
| <i>sch</i> _d_60k-0   | TCCTGTCAAGCGGATGCC          | GGCTGCGTCTCATCGCTTAC         |
| <i>sch</i> _d_60k-1   | CTATCAGCATTGGTAGCGGG        | GAAAAATACGGGAAAATGGC         |
| <i>sch</i> _d_70k-0   | AATCCAGAACAGAGCCAAGC        | CTTTGGGTGGCTGCTCATC          |

**Table S5. Primers used in reverse PCR to identify both ends of the insertion sequence in *sch*<sup>l</sup>**

| Primer name                         | Forward sequence (5'-3')    | Reverse sequence (5'-3')  |
|-------------------------------------|-----------------------------|---------------------------|
| <i>sch</i> <sup>l</sup> -081210-5-1 | ACTATAGCTAACTAACTTTGGATTGCA | GCAGACAGACAGGCACAAGC      |
| <i>sch</i> <sup>l</sup> -081210-5-2 | GCAAACAGACCAATGCATGATG      | CGAGACCAAAGCTCTCGCA       |
| <i>sch</i> <sup>l</sup> -081210-3-1 | GATGATTTTTTGTGTTTGTAG       | AAAAATTTGTAGTGCTAAGGACCTC |
| <i>sch</i> <sup>l</sup> -081210-3-2 | TGCAGTTACTTTTTTAGAAATTGG    | TGGTAAGGGTTGAGGGTTGCT     |

**Table S6. RNAi results of *BmTh* dsRNA injection into the early egg of *pnd*<sup>+</sup>**

| dsRNA concentration        | <i>BmTh</i> -1-dsRNA (1,000 ng/μL) |     | <i>BmTh</i> -1-dsRNA (100 ng/μL) |     | <i>BmTh</i> -2-dsRNA (1,000 ng/μL) |     | <i>BmTh</i> -2-dsRNA (100 ng/μL) |     | EGFP dsRNA (100 ng/μL) |
|----------------------------|------------------------------------|-----|----------------------------------|-----|------------------------------------|-----|----------------------------------|-----|------------------------|
|                            | 1_1                                | 1_2 | 2_1                              | 2_2 | 3_1                                | 3_2 | 4_1                              | 4_2 | Control                |
| Plate No.                  | 1_1                                | 1_2 | 2_1                              | 2_2 | 3_1                                | 3_2 | 4_1                              | 4_2 | Control                |
| Injection egg No.          | 48                                 | 48  | 48                               | 48  | 48                                 | 48  | 48                               | 48  | 96                     |
| Development egg No.        | 36                                 | 39  | 0                                | 13  | 23                                 | 25  | 22                               | 16  | 51                     |
| Chocolate color embryo No. | 36                                 | 39  | 0                                | 13  | 23                                 | 25  | 22                               | 16  | 0                      |
| Black color embryo No.     | 0                                  | 0   | 0                                | 0   | 0                                  | 0   | 0                                | 0   | 51                     |
| Hatched No.                | 0                                  | 0   | 0                                | 0   | 0                                  | 0   | 0                                | 0   | 44                     |

**Table S7. Primers used to quantify *BmTh* gene expression in p50T and *sch* embryos before hatch with real-time PCR**

| Primer name      | Forward sequence (5'–3') | Reverse sequence (5'–3') |
|------------------|--------------------------|--------------------------|
| BmRBL3-RF1       | TCGTCATCGTGGTAAGGTCAA    | TTGTATCCTTGGCCCTTGGT     |
| BmRBL3-RF2       | CGGTGTTGTTGGATACATTGAG   | GTCATCCTGCCATTTCTTACT    |
| <i>BmTh</i> -RF1 | CGCCACGCTTCTGATCTCGATAAC | TTGACACCCAGCGTCTGAATTTG  |
| <i>BmTh</i> -RF2 | TTCCACACACCTGAACCTGACTG  | TGCACAGTCCGAACTCAACCGTAA |
